# Supplementary material for: Development of an Integrated Urban Flood Model and Its Application in a Concave-Down Overpass Area
Source: MDPI journal article supplement (doi:10.3390/rs16101650), 2024-05-07
Supplement: s1 [file s1]

## Supplementary materials

**Table S1** The parameters of the surface runoff module of IUFM (integrated urban flood model).

| Class      | Parameter                                                                                                     | Value                                 |          | Reference  |
|------------|---------------------------------------------------------------------------------------------------------------|---------------------------------------|----------|------------|
|            |                                                                                                               | Grassland                             | Woodland |            |
| Vegetation | Maximum water holding depth over the leaf surface / m                                                         | 0.00035                               | 0.00045  | [33,42,43] |
|            | Precipitation interception rate (fraction of total precipitation represented by canopy rain interception) / % | Related to leaf area index            |          | [42-44]    |
|            | Latent heat of evaporation / MJ m <sup>-3</sup>                                                               | 2500                                  | 2500     | [33,43]    |
|            | Foliage clumping index                                                                                        | 0.9                                   | 0.65     | [45,46]    |
|            | Maximum leaf stomatal conductance / m s <sup>-1</sup>                                                         | 0.019                                 | 0.003    | [33,43]    |
|            | Minimum leaf stomatal conductance / m s <sup>-1</sup>                                                         | 0.000793                              | 0.000366 | [33,43]    |
|            | Leaf cuticular conductance in the case of sufficient water / m s <sup>-1</sup>                                | 0.00004                               | 0.00006  | [33,43]    |
|            | Leaf cuticular conductance in the case of insufficient water / m s <sup>-1</sup>                              | 0.00001                               | 0.00002  | [33,43]    |
|            | Vapor pressure deficit at stomatal opening / mbar                                                             | 0.75                                  | 0.75     | [33,43]    |
|            | Vapor pressure deficit at stomatal closure / mbar                                                             | 0                                     | 0        | [33,43]    |
|            | Leaf water potential at stomatal opening / MPa                                                                | -1                                    | -1       | [33,43]    |
|            | Leaf water potential at stomatal closure / MPa                                                                | -3.5                                  | -1.8     | [33,43]    |
|            | Average canopy height / m                                                                                     | 0.6                                   | 4.4      | [43,47]    |
|            | Leaf characteristics width / m                                                                                | 0.015                                 | 0.02     | [33,43]    |
| Soil       | Soil field capacity / %                                                                                       | 20–30 <sup>a</sup> (24 <sup>b</sup> ) |          | [47, 48]   |
|            | Soil wilting coefficient / %                                                                                  | 9                                     |          | [43,48,49] |
|            | Soil water holding capacity at saturation / mm                                                                | Soil field capacity×2/1.1             |          | [33,43]    |
|            | Soil saturated hydraulic conductivity / cm day <sup>-1</sup>                                                  | 20                                    |          | [10,50,51] |

|            |                                                                |                                             |                         |
|------------|----------------------------------------------------------------|---------------------------------------------|-------------------------|
|            | Soil characteristic parameter                                  | 11.96                                       | [43,50,51]              |
|            | Soil bulk density / $\text{g cm}^{-3}$                         | 1.35–1.40 <sup>a</sup> (1.35 <sup>b</sup> ) | [50], Field measurement |
|            | Maximum (or initial) infiltration rate / $\text{mm h}^{-1}$    | 50–155 <sup>a</sup> (70.2 <sup>b</sup> )    | [10,52]                 |
|            | Minimum (or ultimate) infiltration rate / $\text{mm h}^{-1}$   | 1.32–5 <sup>a</sup> (3.81 <sup>b</sup> )    | [10,50]                 |
|            | Infiltration capacity recovery coefficient / $\text{day}^{-1}$ | 3.91/Antecedent dry days                    | [10,33]                 |
|            | Infiltration capacity decay coefficient / $\text{h}^{-1}$      | 2–7 <sup>a</sup> (5 <sup>b</sup> )          | [10]                    |
| Land cover | Depression storage / mm                                        | 0–15                                        | [10]                    |
|            | Manning's roughness coefficient / $\text{m}^{-1/3} \text{s}$   | 0–0.8                                       | [10]                    |
|            | Runoff curve number 1 (CN1) <sup>c</sup>                       | 41–94                                       | [53,54]                 |
|            | Runoff curve number 2 (CN2) <sup>c</sup>                       | 60–98                                       | [53,54]                 |

<sup>a</sup> The values represent the possible ranges. <sup>b</sup> The values represent the calibrated values based on the actual flood data during the rainstorm event on August 6, 2007. <sup>c</sup> The runoff curve number (CN) is a comprehensive parameter in the soil conservation service curve number (SCS-CN) method [53,54]. CN1 and CN2 refer to the curve number when the soil moisture conditions are dry and normal, respectively. The CN reflects the underlying surface and soil characteristics of the watershed before rainfall and can be used to determine the surface runoff pattern (infiltration excess runoff or saturation excess runoff).

**Table S2** The parameters of the pipe convergence module of IUFM (integrated urban flood model).

| Type    | Parameter                    | Description                                                                                                                                                                                                                                | Value <sup>a</sup> |
|---------|------------------------------|--------------------------------------------------------------------------------------------------------------------------------------------------------------------------------------------------------------------------------------------|--------------------|
| Node    | El / m                       | Invert (channel or utility hole bottom) elevation                                                                                                                                                                                          | 44.0–48.4          |
|         | Max. Depth / m               | Height between invert and ground surface                                                                                                                                                                                                   | 3–5                |
|         | Ponded area / m <sup>2</sup> | Ponded surface area when flooded. If the ponding analysis function is enabled and the parameter value is not zero, the overflow will occur. When the drainage capacity of the pipe network is restored, the overflow returns to the pipes. | >0                 |
| Conduit | Inlet node                   | Identities of the inlet nodes                                                                                                                                                                                                              | /                  |
|         | Outlet node                  | Identities of the outlet nodes                                                                                                                                                                                                             | /                  |
|         | Length / m                   | Conduit length                                                                                                                                                                                                                             | 44.8–550.8         |
|         | Shape                        | Cross-section shape                                                                                                                                                                                                                        | Circular           |
|         | Geom / m                     | Cross-section diameter                                                                                                                                                                                                                     | 0.3–0.9            |
|         | Roughness                    | Manning's roughness coefficient                                                                                                                                                                                                            | 0.014              |

**Table S3** Loss coefficients for different land-cover types in the inundation module of the IUFM (integrated urban flood model).

| Land-cover type | Value                                          |
|-----------------|------------------------------------------------|
| Asphalt road    | 0.011-0.013 <sup>a</sup> (0.011 <sup>b</sup> ) |
| Concrete road   | 0.011-0.013 <sup>a</sup> (0.011 <sup>b</sup> ) |
| Concrete roof   | 0.011-0.013 <sup>a</sup> (0.011 <sup>b</sup> ) |
| Grassland       | 0.15-0.41 <sup>a</sup> (0.25 <sup>b</sup> )    |
| Woodland        | 0.4-0.8 <sup>a</sup> (0.45 <sup>b</sup> )      |
| Brick pavement  | 0.011-0.11 <sup>a</sup> (0.11 <sup>b</sup> )   |

<sup>a</sup> The values are from Manning's roughness coefficient for different land-cover types [51]. <sup>b</sup> The values represent the calibrated values based on the actual flood data during the rainstorm event on August 6 2007.

**Table S4** Spatial composition and configuration metrics for the impervious cover types from the landscape pattern analysis package FRAGSTATS 4.2 [58].

| Landscape metrics |          | Definition                                                                                                                      | Equation                                                                                                                                                     |
|-------------------|----------|---------------------------------------------------------------------------------------------------------------------------------|--------------------------------------------------------------------------------------------------------------------------------------------------------------|
| Area              | PLAND    | Percentage of landscape (%)                                                                                                     | $PLAND = \frac{\sum_{j=1}^n a_{ij}}{A} \times 100$                                                                                                           |
|                   | LPI      | Percentage of the landscape comprised by the largest patch of a cover type (%)                                                  | $LPI = \frac{\max(a_{ij})}{A} \times 100$                                                                                                                    |
| Aggregation       | PLADJ    | Percentage of the number of like cell adjacencies for a cover type in the total number of cell adjacencies in the landscape (%) | $PLADJ = \frac{g_{ii}}{\sum_{k=1}^m g_{ik}} \times 100$                                                                                                      |
| Connectivity      | COHESION | Patch cohesion index                                                                                                            | $COHESION = \frac{\left[ 1 - \frac{\sum_{j=1}^n p_{ij}^*}{\sum_{j=1}^n p_{ij}^* \sqrt{a_{ij}^*}} \right]}{\left[ 1 - \frac{1}{\sqrt{Z}} \right]} \times 100$ |

$a_{ij}$  is the area (m<sup>2</sup>) of patch  $ij$ ;  $A$  is the total landscape area (m<sup>2</sup>);  $g_{ii}$  is the number of like adjacencies (joins) between pixels of patch type (class)  $i$  based on the double-count method;  $g_{ik}$  is the number of adjacencies (joins) between pixels of patch types (classes)  $i$  and  $k$  based on the double-count method;  $p_{ij}^*$  is the perimeter of patch  $ij$  in terms of number of cell surfaces;  $a_{ij}^*$  is the area of patch  $ij$  in terms of number of cells;  $Z$  is the total number of cells in the landscape.

---

## References

10. Rossman, L.A.; Huber, W.C. Hydrology. In Storm Water Management Model Reference Manual; EPA/600/R-15/162A; United States Environmental Protection Agency: Cincinnati, OH, USA, 2016; Volume 1.
33. Feng, C.-H. Eco-Hydrological Effects of Urban Landscape Spatial Pattern Change and Simulation. Ph.D. Thesis, University of Chinese Academy of Sciences, Beijing, China, 2022.
42. He, D.; Hong, W. The Improvement of the Formula of Rainfall Interception by Vegetation. *Syst. Sci. Compr. Stud. Agric.* 1999, 15, 200–202.
43. Zhang, J.; Lei, T.; Zhang, G.; Cai, C.; Huang, Y.; Yang, X. A New Experimental Method for Observing Initial Soil Infiltration under Ring Infiltrometer. *Nongye Jixie Xuebao Trans. Chin. Soc. Agric. Mach.* 2014, 45, 140–146.
44. Yi, C.; Liu, K.; Zhou, T. Research on a Formula of Rainfall Interception by Vegetation. *J. Soil Eros. Water Conserv.* 1996, 2, 47–49.
45. Zhu, G. Retrieval of Leaf Area Index and Foliage Clumping Index from Remotely Sensed Data. Ph.D. Thesis, Nanjing University, 2011.
46. Su, H.; Bai, F.; Li, G. Seasonal Dynamics in Leaf Area Index in Three Typical Temperate Montane Forests of China: A Comparison of Multi-Observation Methods. *Chin. J. Plant Ecol.* 2012, 36, 231–242.
47. Huang, G. Studies on Species Composition and Landscape Aesthetics Evaluation of Urban Forest in Beijing. Ph.D. Thesis, Beijing Forestry University, 2012.
48. Zhou, W.; Liu, G.; Pan, J. Distribution of Available Soil Water Capacity in China. *J. Geogr. Sci.* 2005, 15, 3–12.
49. Wang, J. Field Water Capacity Measurement and Results Analysis of Langfang National Drought Reporting Station. *Groundwater* 2016, 38, 25–26.
50. Dai, Z.; Sui, J.; Xu, R.; Li, X. Study on Soil Water Infiltration in Different Urban Green Space in Beijing. *Chin. Landsc. Archit.* 2019, 36, 105–108.
51. Edoardo, Porporato, Amilcare, et al. Coupled Dynamics of Photosynthesis, Transpiration, and Soil Water Balance. Part I: Upscaling from Hourly to Daily Level. *J Hydrometeorology*. 2009, 5, 559–566.
52. Zhang, N.; Luo, Y.; Chen, X.; Li, Q.; Jing, Y.; Wang, X.; Feng, C. Understanding the Effects of Composition and Configuration of Land Covers on Surface Runoff in a Highly Urbanized Area. *Ecol. Eng.* 2018, 125, 11–25, doi:10.1016/j.ecoleng.2018.10.008.
53. Fu, S.; Wang, H.; Wang, X. The Runoff Curve Number of SCS-CN Method in Beijing. *Geogr. Res.* 2013, 32, 797–807.
54. Neitsch, S.L., Williams, J.R., Arnold, J.G. and Kiniry, J.R. Hydrology in Soil and Water Assessment Tool Theoretical Documentation. Texas Water Resources Institute, College Station, Texas, 2009.
58. McGarigal, K.; Cushman, S.A.; Ene, E. FRAGSTATS: Spatial Pattern Analysis Program for Categorical Maps. University of Massachusetts, Amherst. 2005. Available online: <https://www.fragstats.org> (accessed on 2 May 2024).
